# Supplementary material for: Effects of a Diet Containing Sources of Prebiotics and Probiotics and Modification of the Gut Microbiota on the Reduction of Body Fat
Source: MDPI journal article supplement (doi:10.3390/ijerph20021348), 2023-01-11
Supplement: s1 [file s1]

**Table S1.** Demographic data and physical activity of study participants before the study.

| Sociodemographic factors      |                     | Total respondents |      | Group A |      | Group B |      | p      |
|-------------------------------|---------------------|-------------------|------|---------|------|---------|------|--------|
|                               |                     | N                 | %    | N       | %    | N       | %    |        |
| Education                     | Higher              | 21                | 50.0 | 12      | 63.2 | 9       | 39.1 | 0.3121 |
|                               | Secondary           | 11                | 26.2 | 3       | 15.8 | 8       | 34.8 |        |
|                               | Vocational          | 7                 | 16.7 | 3       | 15.8 | 4       | 17.4 |        |
|                               | Primary             | 3                 | 7.1  | 1       | 5.3  | 2       | 8.7  |        |
| Employment                    | Manual worker       | 13                | 31.0 | 6       | 31.6 | 7       | 30.4 | 0.4472 |
|                               | White-collar worker | 24                | 57.1 | 10      | 52.6 | 14      | 60.9 |        |
| Marital status                | Student             | 3                 | 7.1  | 2       | 10.5 | 1       | 4.3  |        |
|                               | Unemployed          | 2                 | 4.8  | 1       | 5.3  | 1       | 4.3  |        |
|                               | Not Married         | 13                | 31.0 | 8       | 42.1 | 5       | 21.7 |        |
|                               | Married             | 24                | 57.1 | 11      | 57.9 | 13      | 56.5 |        |
|                               | Divorcee            | 4                 | 9.5  | 0       | 0.0  | 4       | 17.4 |        |
|                               | Widow               | 1                 | 2.4  | 0       | 0.0  | 1       | 4.3  |        |
| Physical activity frequency   | I do not exercise   | 25                | 59.5 | 10      | 52.6 | 15      | 65.2 | 0.6133 |
|                               | Once a week         | 6                 | 14.3 | 4       | 21.1 | 2       | 8.7  |        |
|                               | 2–3 times a week    | 7                 | 16.7 | 3       | 15.8 | 4       | 17.4 |        |
|                               | 4–5 times a week    | 1                 | 2.4  | 1       | 5.3  | 0       | 0.0  |        |
|                               | Daily               | 3                 | 7.1  | 1       | 5.3  | 2       | 8.7  |        |
| Duration of physical activity | Up to 30 minutes    | 30                | 71.4 | 11      | 57.9 | 19      | 82.6 | 0.1506 |
|                               | 30–60 minutes       | 4                 | 9.5  | 2       | 10.5 | 2       | 8.7  |        |

|           |   |      |   |      |   |     |
|-----------|---|------|---|------|---|-----|
| 1–2 hours | 8 | 19.0 | 6 | 31.6 | 2 | 8.7 |
|-----------|---|------|---|------|---|-----|

N – number, p - chi-squared test.

**Table S2.** Food intake of female study participants before dietary change.

| Products and product groups analysed | TOTAL RESPONDENTS<br>N=42 |      |        | DIET A<br>N=19 | DIET B<br>N=23 | Mann-Whitney<br>U test<br>p |
|--------------------------------------|---------------------------|------|--------|----------------|----------------|-----------------------------|
|                                      | Me±Q                      | Min  | Max    | Me±Q           | Me±Q           |                             |
| CEREAL PRODUCTS [g]                  | 173.6 ± 44.2              | 92.2 | 340.5  | 174.2 ± 25.1   | 173.0 ± 47.1   | 0.8596                      |
| Groats [g]                           | 0.00 ± 0.00               | 0.0  | 33.2   | 0.00 ± 0.00    | 0.00 ± 0.00    | 0.7046                      |
| Light bread [g]                      | 93.3 ± 23.3               | 0.0  | 250.0  | 101.4 ± 43.3   | 90.0 ± 26.7    | 0.4792                      |
| Wholemeal bread [g].                 | 0.0 ± 21.7                | 0.0  | 96.7   | 0.0 ± 26.7     | 0.0 ± 21.7     | 0.7810                      |
| MILK AND MILK PRODUCTS [g]           | 234.0 ± 89.2              | 35.8 | 698.9  | 220.0 ± 99.4   | 251.0 ± 99.7   | 0.2209                      |
| Milk [g]                             | 108.2 ± 48.7              | 0.0  | 474.1  | 108.2 ± 39.1   | 105.3 ± 58.2   | 0.8201                      |
| Total yoghurts and kefirs [g]        | 0.5 ± 66.7                | 0.0  | 350.0  | 0.0 ± 66.7     | 16.7 ± 100.0   | 0.4484                      |
| EGGS [g]                             | 35.4 ± 22.5               | 0.0  | 144.7  | 34.0 ± 22.8    | 36.7 ± 20.5    | 0.7235                      |
| MEAT, FISH, MEAT PRODUCTS [g]        | 175.7 ± 45.7              | 40.0 | 641.7  | 187.3 ± 44.6   | 165.7 ± 61.7   | 0.6675                      |
| Meat [g]                             | 30.9 ± 34.6               | 0.0  | 153.0  | 34.0 ± 25.5    | 27.2 ± 38.2    | 0.9095                      |
| Poultry [g]                          | 36.3 ± 28.8               | 0.0  | 192.5  | 41.7 ± 26.5    | 21.3 ± 30.1    | 0.6675                      |
| Fish [g]                             | 0.0 ± 15.8                | 0.0  | 76.7   | 0.0 ± 28.4     | 0.0 ± 0.0      | 0.0812                      |
| Butter [g]                           | 7.5 ± 6.7                 | 0.0  | 45.0   | 5.0 ± 5.8      | 11.7 ± 9.2     | 0.1975                      |
| VEGETABLES AND FRUIT [g]             | 286.9 ± 116.9             | 19.1 | 1080.5 | 259.1 ± 82.6   | 353.9 ± 157.9  | 0.5956                      |
| Vegetables [g]                       | 222.1 ± 93.6              | 19.1 | 501.5  | 192.1 ± 82.9   | 248.8 ± 85.6   | 0.2501                      |
| Sauerkraut [g]                       | 0.0 ± 1.8                 | 0.0  | 50.0   | 0.0 ± 0.0      | 0.0 ± 11.1     | 0.3563                      |
| Fermented cucumbers [g]              | 5.1 ± 11.6                | 0.0  | 83.3   | 2.0 ± 6.5      | 9.0 ± 15.0     | 0.3182                      |
| Fruit [g]                            | 91.7 ± 72.0               | 0.0  | 598.8  | 96.6 ± 63.3    | 89.5 ± 81.2    | 0.5611                      |
| DRY LEGUME [g]                       | 0.0 ± 0.0                 | 0.0  | 50.5   | 0.0 ± 0.0      | 0.0 ± 0.0      | 0.8596                      |
| SUGARS AND SWEETS [g]                | 30.2 ± 15.6               | 0.0  | 114.9  | 22.8 ± 13.7    | 34.7 ± 16.4    | 0.1975                      |
| DRINKS [ml]                          | 1 005 ± 283               | 133  | 2966   | 853 ± 349      | 1 050 ± 262    | 0.3369                      |
| Coffee, sugar-free infusion [ml]     | 300.0 ± 133.3             | 0.0  | 800.0  | 200.0 ± 116.7  | 350.0 ± 150.0  | <b>0.0248</b>               |
| Tea, sugar-free infusion [ml]        | 208.3 ± 208.3             | 0.0  | 833.3  | 83.3 ± 208.3   | 333.3 ± 158.3  | 0.1327                      |
| Highly mineralised water [ml]        | 0.0 ± 0.0                 | 0.0  | 883.3  | 0.0 ± 0.0      | 0.0 ± 0.0      | 0.8995                      |

N - number, Me - median, Q - quartile deviation, Min - minimum value, Max - maximum value, p - statistical significance value.
